# Supplementary material
Source: publisher figshare collection journal article supplement (https://karger.figshare.com/ndownloader/files/31519118)
Supplement: Supplementary file 1 [file 31519118]

| **Questions** |  | **studies** | | | | | | | | | | | | | | | | | | | | | | | | |
| --- | --- | --- | --- | --- | --- | --- | --- | --- | --- | --- | --- | --- | --- | --- | --- | --- | --- | --- | --- | --- | --- | --- | --- | --- | --- | --- |
| 1 | 2 | 3 | 4 | 5 | 6 | 7 | 8 | 9 | 10 | 11 | 12 | 13 | 14 | 15 | 16 | 17 | 18 | 19 | 20 | 21 | 22 | 23 | 24 | 25 |
| **introduction** | | | | | | | | | | | | | | | | | | | | | | | | | | |
| 1. [Were the aims/objectives of the study clear?](#_bookmark2) | Yes | * | * | * | * | * | * | * | * | * | - | * | * | * | * | - | * | * | * | * | * | * | * | * | * | * |
| No |  |  |  |  |  |  |  |  |  |  |  |  |  |  |  |  |  |  |  |  |  |  |  |  |  |
| DN/C1 |  |  |  |  |  |  |  |  |  |  |  |  |  |  |  |  |  |  |  |  |  |  |  |  |  |
| **methods** | | | | | | | | | | | | | | | | | | | | | | | | | | |
| 2. [Was the study design appropriate for the stated aim(s)?](#_bookmark5) | Yes | * | * | * | * | * | * | * | * | * | - | * | * | * | * | - | * | * | * | * | * | * | * | * | * | * |
| No |  |  |  |  |  |  |  |  |  |  |  |  |  |  |  |  |  |  |  |  |  |  |  |  |  |
| DN/C |  |  |  |  |  |  |  |  |  |  |  |  |  |  |  |  |  |  |  |  |  |  |  |  |  |
| 3. [Was the sample size justified?](#_bookmark6) | Yes |  |  |  |  |  |  |  |  |  |  |  |  |  |  |  |  |  |  |  |  | * |  |  |  |  |
| No | * | * | * | * | * | * | * | * | * | - | * | * | * | * | - | * | * | * | * | * |  | * | * | * | * |
| DN/C |  |  |  |  |  |  |  |  |  |  |  |  |  |  |  |  |  |  |  |  |  |  |  |  |  |
| 4. [Was the target/reference population clearly defined? (Is it clear who the](#_bookmark8) [research was about?)](#_bookmark8) | Yes | * | * | * | * | *1 | *1 | * | * | * | - | * | * | * | * | - | * | * | * | *1 | * | * | * | * | *  1 | * |
| No |  |  |  |  |  |  |  |  |  |  |  |  |  |  |  |  |  |  |  |  |  |  |  |  |  |
| DN/C |  |  |  |  |  |  |  |  |  |  |  |  |  |  |  |  |  |  |  |  |  |  |  |  |  |
| 5. [Was the sample frame taken from an appropriate population base so that it](#_bookmark9) [closely represented the target/reference population under investigation?](#_bookmark9) | Yes |  | * | * | * | * | * | * | * | * | - | * | * | * | * | - | * | * | * | * | * | * | * | * | * | * |
| No | * |  |  |  |  |  |  |  |  |  |  |  |  |  |  |  |  |  |  |  |  |  |  |  |  |
| DN/C |  |  |  |  |  |  |  |  |  |  |  |  |  |  |  |  |  |  |  |  |  |  |  |  |  |
| 6. [Was the selection process likely to select subjects/participants that were](#_bookmark11) [representative of the target/reference population under investigation?](#_bookmark11) | Yes |  |  |  |  | * | * |  | * |  | - |  |  |  |  | - |  |  |  |  |  | * |  |  |  |  |
| No | * | * | * | * |  |  | * |  | * |  | * | * | * | * |  | * | * | * | * | * |  | * | * | * | * |
| DN/C |  |  |  |  |  |  |  |  |  |  |  |  |  |  |  |  |  |  |  |  |  |  |  |  |  |
| 7. [Were measures undertaken to address and categorize non-responders?](#_bookmark12) | Yes |  | * |  |  |  |  |  |  | * | - |  |  | * |  | - |  |  |  |  |  | * | * | * | * |  |
| No |  |  | * | * | * | * | * | * |  |  | * | * |  | * |  | * | * | * | * | * |  |  |  |  | * |
| DN/C | * |  |  |  |  |  |  |  |  |  |  |  |  |  |  |  |  |  |  |  |  |  |  |  |  |
| 8. [Were the risk factor and outcome variables measured appropriate to the aims](#_bookmark13) [of the study?](#_bookmark13) | Yes |  | * | * | * | * | * | * | * | * | - | * | * | * | * | - | * | * | * | * | * | * | * | * | * | * |
| No | * |  |  |  |  |  |  |  |  |  |  |  |  |  |  |  |  |  |  |  |  |  |  |  |  |
| DN/C |  |  |  |  |  |  |  |  |  |  |  |  |  |  |  |  |  |  |  |  |  |  |  |  |  |
| 9. [Were the risk factor and outcome variables measured correctly using](#_bookmark13) [instruments/measurements that had been trialed, piloted or published](#_bookmark13) [previously?](#_bookmark13) | Yes |  |  | * |  |  |  |  |  |  | - |  |  |  |  | - |  |  |  |  |  |  |  |  | * |  |
| No | * | * |  | * | * | * | * | * | * |  | * | * | * | * |  | * | * | * | * | * | * | * | * |  | * |
| DN/C |  |  |  |  |  |  |  |  |  |  |  |  |  |  |  |  |  |  |  |  |  |  |  |  |  |
| 10. [Is it clear what was used to determined statistical significance and/or](#_bookmark14) [precision estimates? (e.g. p-values, confidence intervals)](#_bookmark14) | Yes |  | * | * | * | * | * | * | * |  | - | * |  | * | * | - |  | * | * |  |  | * |  |  | * | * |
| No | * |  |  |  |  |  |  |  | * |  |  | * |  |  |  | * |  |  | * | * |  |  | * |  |  |
| DN/C |  |  |  |  |  |  |  |  |  |  |  |  |  |  |  |  |  |  |  |  |  | * |  |  |  |
| 11. [Were the methods (including statistical methods) sufficiently described to](#_bookmark16) [enable them to be repeated?](#_bookmark16) | Yes |  | * | * | * | * | * | * | * | * | - | * |  | * | * | - |  | * | * | * | * | * | * | * | * | * |
| No | * |  |  |  |  |  |  |  |  |  |  | * |  |  |  | * |  |  |  |  |  |  |  |  |  |
| DN/C |  |  |  |  |  |  |  |  |  |  |  |  |  |  |  |  |  |  |  |  |  |  |  |  |  |
| **Results** | | | | | | | | | | | | | | | | | | | | | | | | | | |
| 12. [Were the basic data adequately described?](#_bookmark18) | Yes |  | * | * | * | * | * | * | * | * | - | * | * | * | * | - | * | * | * | * | * | * | * | * | * | * |
| No | * |  |  |  |  |  |  |  |  |  |  |  |  |  |  |  |  |  |  |  |  |  |  |  |  |
| DN/C |  |  |  |  |  |  |  |  |  |  |  |  |  |  |  |  |  |  |  |  |  |  |  |  |  |
| 13. [Does the response rate raise concerns about non-response bias?](#_bookmark19) | Yes |  |  |  |  |  |  |  |  |  | - |  |  |  |  | - |  |  |  |  |  |  |  |  | * |  |
| No |  | * | * |  | * | * | * | * | * |  | * | * | * | * |  | * | * | * | * | * | * | * | * |  | * |
| DN/C | * |  |  | * |  |  |  |  |  |  |  |  |  |  |  |  |  |  |  |  |  |  |  |  |  |
| 14. [If appropriate, was information about non-responders described?](#_bookmark19) | Yes |  |  |  |  |  |  |  |  | * | - |  |  |  |  | - |  |  |  |  |  | * |  |  |  |  |
| No | * | * | * | * | * | * | * | * |  |  | * | * | * | * |  | * | * | * | * | * |  | * | * | * | * |
| DN/C |  |  |  |  |  |  |  |  |  |  |  |  |  |  |  |  |  |  |  |  |  |  |  |  |  |
| 15. [Were the results internally consistent?](#_bookmark20) | Yes |  | * | * | * | * | * | * | * | * | - | * | * | * | * | - |  | * | * |  |  | * | * | * | * | * |
| No | * |  |  |  |  |  |  |  |  |  |  |  |  |  |  | * |  |  | * | * |  |  |  |  |  |
| DN/C |  |  |  |  |  |  |  |  |  |  |  |  |  |  |  |  |  |  |  |  |  |  |  |  |  |
| 16. [Were the results presented for all the analyses described in the methods?](#_bookmark21) | Yes | * | * | * | * | * | * | * | * | * | - | * | * | * | * | - | * | * | * | * | * | * | * | * | * | * |
| No |  |  |  |  |  |  |  |  |  |  |  |  |  |  |  |  |  |  |  |  |  |  |  |  |  |
| DN/C |  |  |  |  |  |  |  |  |  |  |  |  |  |  |  |  |  |  |  |  |  |  |  |  |  |
| **Discussion** | | | | | | | | | | | | | | | | | | | | | | | | | | |
| 17. [Were the authors' discussions and conclusions justified by the results?](#_bookmark23) | Yes | * | * | * | * | * | * | * | * | * | - | * | * | * | * | - | * | * | * | * | * | * | * | * | * | * |
| No |  |  |  |  |  |  |  |  |  |  |  |  |  |  |  |  |  |  |  |  |  |  |  |  |  |
| DN/C |  |  |  |  |  |  |  |  |  |  |  |  |  |  |  |  |  |  |  |  |  |  |  |  |  |
| 18. [Were the limitations of the study discussed?](#_bookmark29) | Yes |  | * | * | * | * | * | * | * | * | - | * |  | * |  | - |  | * | * |  |  | * | * |  | * | * |
| No | * |  |  |  |  |  |  |  |  |  |  | * |  | * |  | * |  |  | * | * |  |  | * |  |  |
| DN/C |  |  |  |  |  |  |  |  |  |  |  |  |  |  |  |  |  |  |  |  |  |  |  |  |  |
| **Others** | | | | | | | | | | | | | | | | | | | | | | | | | | |
| 19. [Were there any funding sources or conflicts of interest that may affect the](#_bookmark31) [authors’ interpretation of the results?](#_bookmark31) | Yes | * | * | * | * | * |  |  | * |  | - | * |  | * |  | - | * | * | * | * |  | * | * | * |  |  |
| No |  |  |  |  |  | * | * |  | * |  |  | * |  | * |  |  |  |  |  | * |  |  |  | * | * |
| DN/C |  |  |  |  |  |  |  |  |  |  |  |  |  |  |  |  |  |  |  |  |  |  |  |  |  |
| 20. [Was ethical approval or consent of participants attained?](#_bookmark32) | Yes | * | * | * | * |  |  | * | * |  | - | * |  | * |  | - | * |  |  | * |  | * | * | * |  | * |
| No |  |  |  |  |  |  |  |  | * |  |  | * |  | * |  |  |  |  |  | * |  |  |  |  |  |
| DN/C |  |  |  |  | *2 | *2 |  |  |  |  |  |  |  |  |  |  | 2* | 2* |  |  |  |  |  | *  2 |  |

Notes:

- DN/C: don’t know/comment
- 1: the sample size is community or neighborhood
- 2: no need to receive consent
- Black number: cross sectional studies
- Green number: studies with mixed method
- Red number: qualitative studies
